## Correction

# Correction: A Molecularly Cloned, Live-Attenuated Japanese Encephalitis Vaccine SA<sub>14</sub>-14-2 Virus: A Conserved Single Amino Acid in the *ij* Hairpin of the Viral E Glycoprotein Determines Neurovirulence in Mice

## The PLOS Pathogens Staff

The file “Text S1” is omitted from the list of Supporting Information in the original article. It can be downloaded below. The reference to “Supporting Information” in the section entitled, “JEV reverse genetics”, refers to the supplementary materials and methods file, “Text S1”.

## Supporting Information

Text S1. Supplementary Materials and Methods. (PDF)

## References

1. Yun S-I, Song B-H, Kim J-K, Yun G-N, Lee E-Y, et al. (2014) A Molecularly Cloned, Live-Attenuated Japanese Encephalitis Vaccine SA<sub>14</sub>-14-2 Virus: A Conserved Single Amino Acid in the *ij* Hairpin of the Viral E Glycoprotein Determines Neurovirulence in Mice. PLoS Pathog 10(7): e1004290. doi:10.1371/journal.ppat.1004290

---

**Citation:** The PLOS Pathogens Staff (2014) Correction: A Molecularly Cloned, Live-Attenuated Japanese Encephalitis Vaccine SA<sub>14</sub>-14-2 Virus: A Conserved Single Amino Acid in the *ij* Hairpin of the Viral E Glycoprotein Determines Neurovirulence in Mice. PLoS Pathog 10(9): e1004465. doi:10.1371/journal.ppat.1004465

**Published:** September 22, 2014

**Copyright:** © 2014 The PLOS Pathogens Staff. This is an open-access article distributed under the terms of the Creative Commons Attribution License, which permits unrestricted use, distribution, and reproduction in any medium, provided the original author and source are credited.
